# Supplementary material
Source: Springer Nature journal article supplement (https://www.springermedizin.de/resource/supplementary/12879_2013_2420_MOESM8_ESM.pdf/9444524)

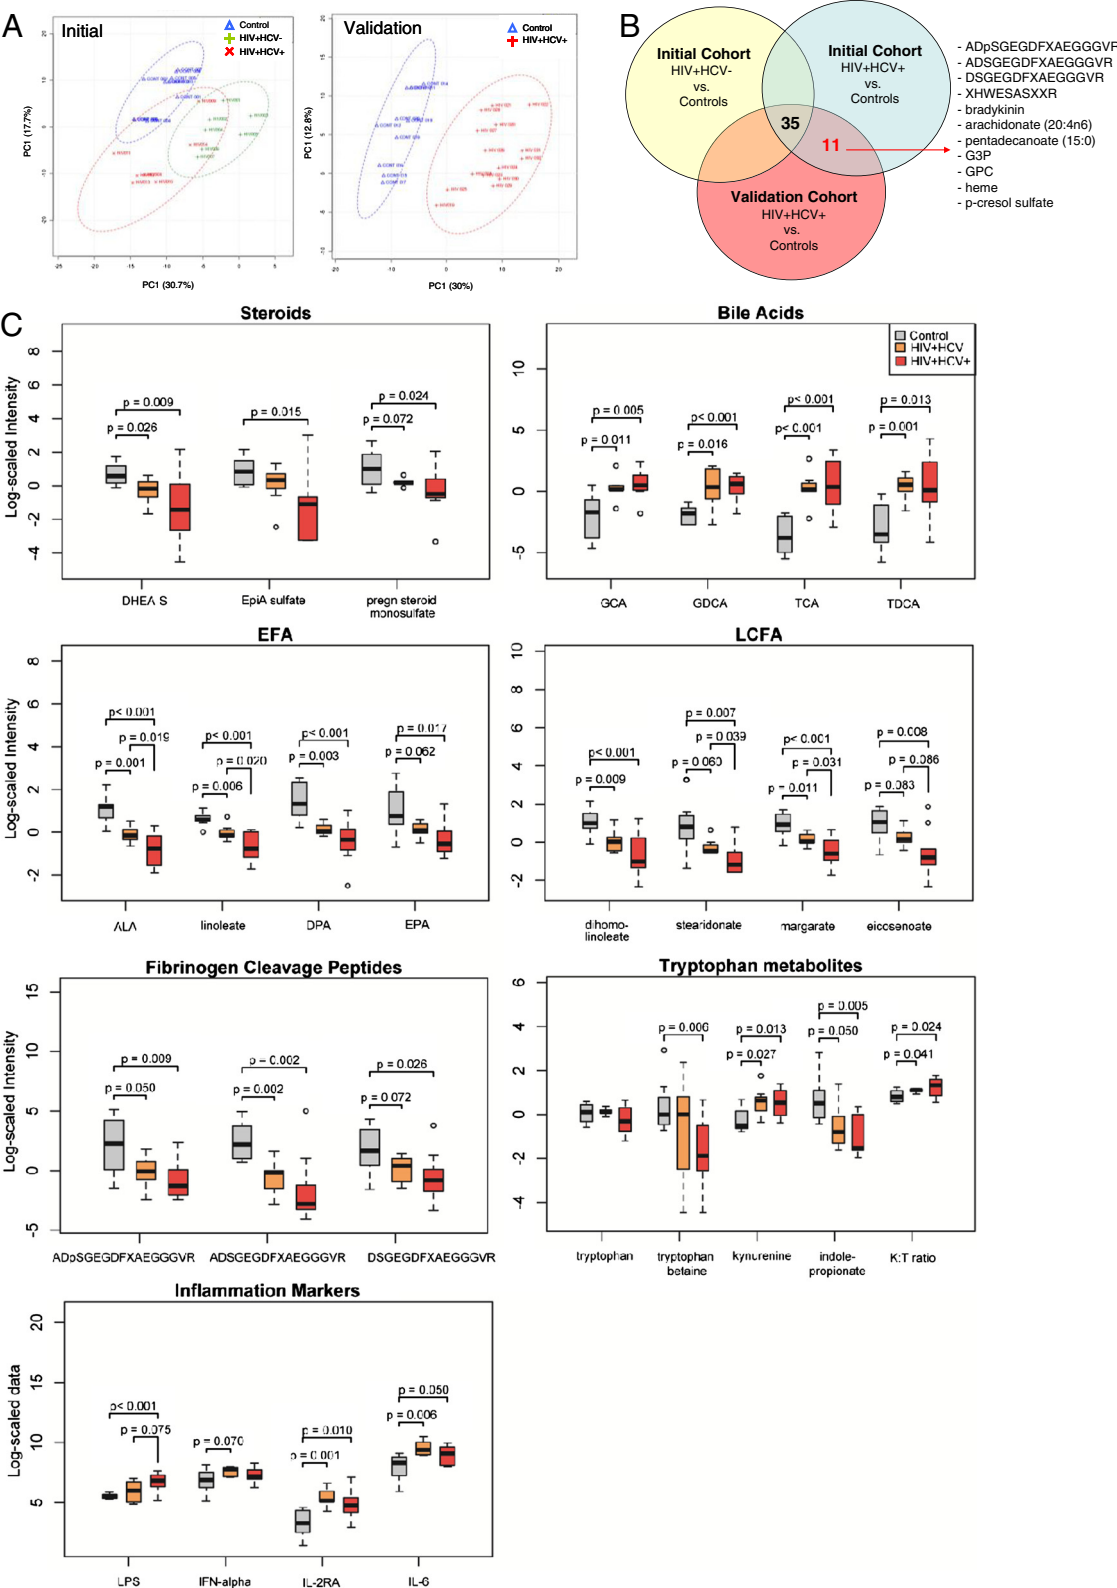

Supplement: MOESM8 [file 9444524]
